# Supplementary material for: LIFEx: A Freeware for Radiomic Feature Calculation in Multimodality Imaging to Accelerate Advances in the Characterization of Tumor Heterogeneity
Source: Oxford University Press journal article supplement (doi:10.1158/0008-5472.can-18-0125), 2018-06-29
Supplement: 00085472can180125-sup-195449_2_supp_4834876_plj0lx.docx [file 00085472can180125-sup-195449_2_supp_4834876_plj0lx.docx]

| Software | Ibex | SlicerRadiomics | Texrad | Mazda | CGITA | LIFEx |
| --- | --- | --- | --- | --- | --- | --- |
| System / Install:  Installation program  Required runtime  System compatibility | No  Matlab viewer  Win | Yes*  3DSlicer  Mac,Linux,Win | Yes  None  Win (server) | No  None  Win | No  Matlab  Linux,Win | Yes  None  Mac,Linux,Win |
| Features:  Friendly GUI  Supported imaging modality  PACS connectivity  Input image format  Multimodal processing | No  CT,MR,PET,...  No  DICOM  No | Some  CT,MR,PET,...  Via 3DSlicer  DICOM,JPG,NII,..  No | Some  CT,MR,...  Full DICOM  DICOM  No | Some  CT,MR,PET,...  No  DICOM,BMP  No | No  CT,PET,…  No  DICOM  No | Yes  CT,MR,PET,US  Full DICOM  DICOM,JPG,PNG,...  Yes |
| ROI  Input format  Drawing tools  Automatic drawing tools | 3DSlicer  3DSlicer  3DSlicer | 3DSlicer  3DSlicer  3DSlicer | xml  Yes  Yes | No  Yes  Yes | RTSTRUCT, img  No  Yes for PET | RTSTRUCT, nii, img  3D brush  Yes for PET |
| Calculated image features  Conventional Indices  Histogram  Shape  Texture parameters settings  Number of Grey Levels  Resampling method  Resampling range  GLCM1 matrix  GLRLM1 matrix  NGLDM1 matrix  GLZLM1 matrix  Wavelet  Output format | 3DSlicer  Yes  Yes  Yes  Yes  Yes  Yes  Yes  Yes  Yes  No  No  xls | Yes  Yes  Yes  Some  No  No  No  Yes  Yes  Yes  Yes  Yes  txt | Yes  Yes  No  No  No  No  No  No  No  No  No  No  xml | Yes  Yes  Yes  Yes  Yes  Yes  Yes  Yes  Yes  No  No  Yes  txt | Yes  Yes  Yes  Yes  Yes  Yes  Yes  Yes  Yes  Yes  Yes  No  xls | Yes  Yes  Yes  Yes  Yes  Yes  Yes  Yes  Yes  Yes  Yes  No  xls, csv |
| Doc / License:  Cost  Existing datasets  CMS (web)  Documentation  Release date | OpenSource  No  No  Some  2014 | OpenSource  Yes  Yes  Some  2017 | $$  Yes  Yes  Yes  2014 | Freeware  No  No  Complete 1996 | OpenSource  No  No  Some  2012 | Freeware  Yes  Yes  Complete  2016 |

*not fully working at testing time (April 2018)

1GLCM: Gray-Level Co-occurrence matrix, GLRLM: Gray-Level Run Length Matrix, NGLDM: Neighboring Gray-Level Dependence Matrix, GLZLM: Gray-Level Zone Length Matrix
